# Supplementary material for: Association Between Intrauterine System Hormone Dosage and Depression Risk
Source: Atypon-hosted journal article supplement (doi:10.1176/appi.ajp.20230909), 2024-07-10
Supplement: appi.ajp.20230909.ds001.pdf [file appi.ajp.20230909.ds001.pdf]

## CONTENTS

**Table S1.** Overview of registers, variables, and codes

**Figure S1.** Flowchart of how study population was obtained from source population

**Figure S2.** Forest plot with hazard ratios of developing depression for the complete output of the main analysis

**Table S2.** Average absolute risks, risk differences, and risk ratios for depression diagnosis and antidepressant prescription

**Table S3.** Average absolute risks, risk differences, and risk ratios of starting antidepressant not specifically prescribed for other indications

**Table S4.** Demographics and clinical profiles restricted to incident users between 2017-2022

**Table S5.** Average absolute risks, risk differences, and relative risks of developing depression between different LNG-IUSs restricted to incident users between 2017-2022

**Table S6.** Demographics and clinical profiles restricted to nulliparous incident LNG-IUS users younger than 30 years of age

**Table S7.** Average absolute risks, risk differences, and relative risks of developing depression between different LNG-IUSs restricted to nulliparous incident LNG-IUS users younger than 30 years of age

**Table S8.** Average absolute risks, risk differences, and relative risks of developing depression between different LNG-IUSs when adjusted for menorrhagia as prescription indication and previous hormonal contraceptive use

**Table S9.** Standard means and standard mean differences of covariates between the groups before and after propensity score weighting

**Figure S3.** Multinomial propensity score distributions obtained with gradient boosted logistic regression

**Table S10.** Average absolute risks, risk differences, and relative risks of developing depression between different LNG-IUSs in women with history of mental disorder

**TABLE S1. Overview of registers, variables, and codes**

| Registers                                                                                                                | Variables                              | Codes                                                                     |
|--------------------------------------------------------------------------------------------------------------------------|----------------------------------------|---------------------------------------------------------------------------|
| <b>Danish Civil Registration System</b> (data since 1968)                                                                |                                        |                                                                           |
|                                                                                                                          | Date of birth, immigration, emigration |                                                                           |
| <b>The Cause of Death Register</b> (data since 1970)                                                                     |                                        |                                                                           |
|                                                                                                                          | Date of death                          |                                                                           |
| <b>Demographic Registers of Statistics Denmark</b>                                                                       |                                        |                                                                           |
|                                                                                                                          | Educational degree                     |                                                                           |
| <b>Danish Medical Birth Register</b> (complete data since 1973)                                                          |                                        |                                                                           |
|                                                                                                                          | Date of childbirth                     |                                                                           |
| <b>Danish National Patient Register</b> (complete data since 1977)                                                       |                                        |                                                                           |
|                                                                                                                          | Polycystic ovary syndrome              | ICD-8: 256.9<br>ICD-10: E282                                              |
|                                                                                                                          | Endometriosis                          | ICD-8: 625.3<br>ICD-10: N80                                               |
|                                                                                                                          | Dysmenorrhea                           | ICD-8: 626.3<br>ICD-10: N943-946                                          |
|                                                                                                                          | Leiomyoma                              | ICD-8: 218<br>ICD-10: D25                                                 |
|                                                                                                                          | Menorrhagia                            | ICD-8: 626.2<br>ICD-10: N92                                               |
| <b>The Psychiatric Central Register</b> (complete data since 1969 on hospital admission and 1995 on outpatient contacts) |                                        |                                                                           |
|                                                                                                                          | Mental disorders                       | ICD-8: 290-315 (except 302.0 and 302.3)<br>ICD-10: F00-99                 |
|                                                                                                                          | Depression                             | ICD-8: 296.09, 296.29, 298.09, 300.49, 301.19<br>ICD-10: F32-34, F38, F39 |
| <b>Danish Prescription Register</b> (complete data since 1995)                                                           |                                        |                                                                           |
|                                                                                                                          | LNG-IUS                                | ATC: G02BA03                                                              |
|                                                                                                                          | Other HC types                         |                                                                           |
|                                                                                                                          | COC                                    | ATC: G03AA* (except for G03AA13), G03AB*, and G03HB01                     |
|                                                                                                                          | Patch                                  | ATC: G03AA13                                                              |
|                                                                                                                          | Vaginal ring                           | ATC: G02BB01                                                              |
|                                                                                                                          | POP                                    | ATC: G03AC* (except for G03AC06 and G03AC08)                              |
|                                                                                                                          | Implant                                | ATC: G03AC08                                                              |
|                                                                                                                          | Depot injections                       | ATC: G03AC06                                                              |
|                                                                                                                          | Antidepressant medication              | ATC: Codes starting with N06A                                             |
|                                                                                                                          | Psychotropic drugs                     | ATC: Codes starting with N05 and N06                                      |

ATC, Anatomical Therapeutic Chemical Classification system; ICD-8, International Classification of Disease and Health Related Problems, 8th revision; COC, combined oral contraceptive; HC; hormonal contraception; ICD-10, 10th revision; LNG-IUS, levonorgestrel-releasing intrauterine system; POP, progestogen-only pill

**FIGURE S1.** Flowchart of how study population was obtained from source population

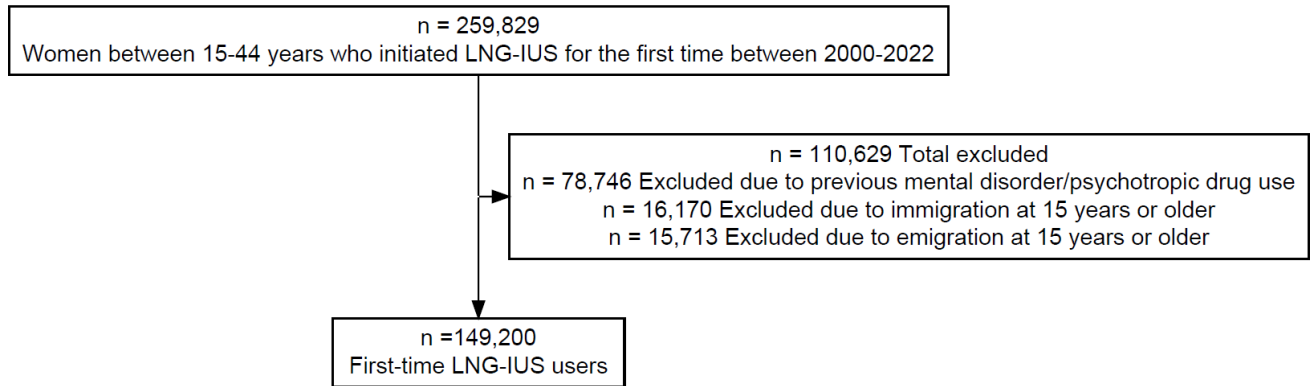

**FIGURE S2.** Forest plot with hazard ratios of developing depression for the complete output of the main analysis

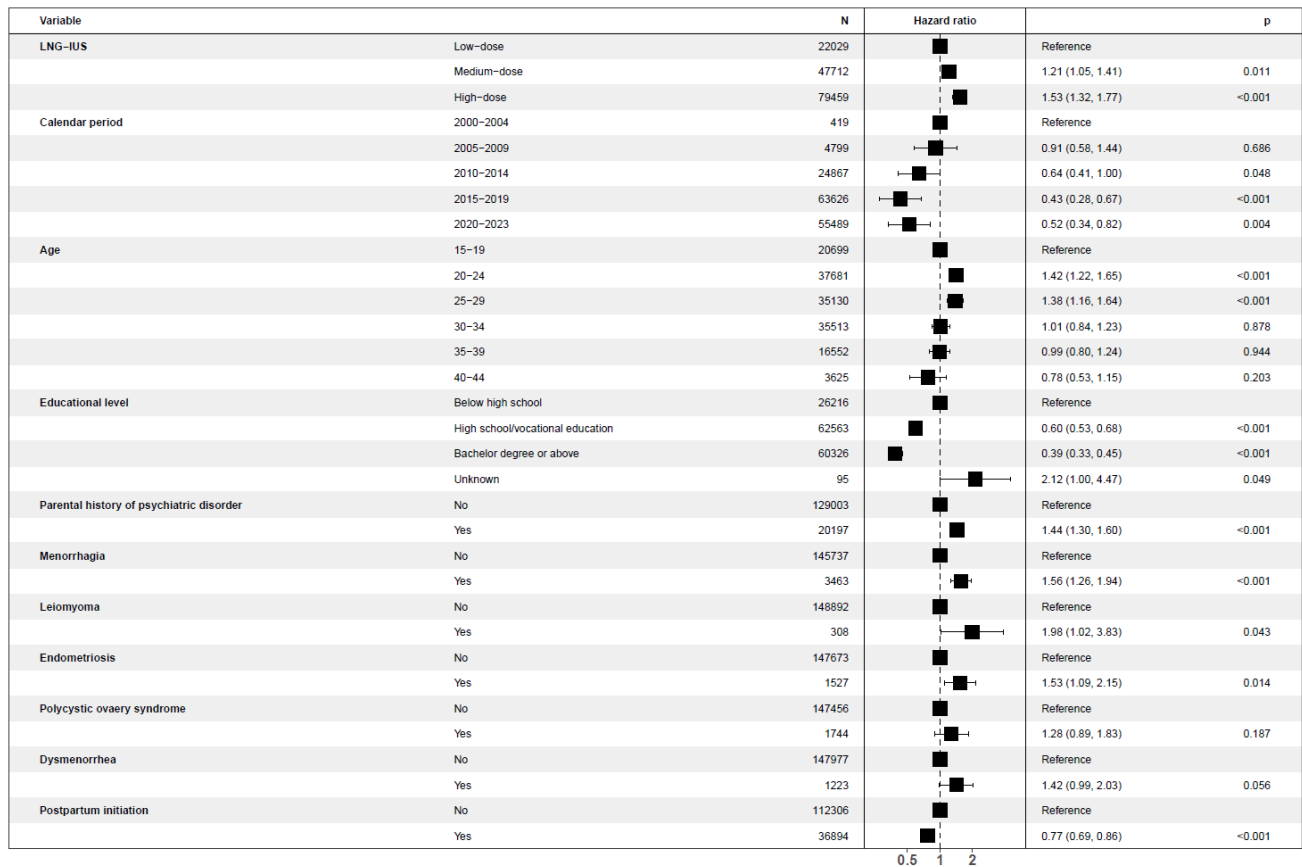

**TABLE S2. Average absolute risks, risk differences, and risk ratios for depression diagnosis and antidepressant prescription**

| <b>Antidepressant medication (n=2110)</b>       |                         |               |                    |               |                  |               |
|-------------------------------------------------|-------------------------|---------------|--------------------|---------------|------------------|---------------|
| <b>Measure</b>                                  | <b>LNG-IUS Exposure</b> |               |                    |               |                  |               |
|                                                 | <b>Low Dose</b>         |               | <b>Medium Dose</b> |               | <b>High Dose</b> |               |
|                                                 | <b>%</b>                | <b>95% CI</b> | <b>%</b>           | <b>95% CI</b> | <b>%</b>         | <b>95% CI</b> |
| Absolute risk <sup>a</sup>                      | 1.06                    | 0.92-1.21     | 1.33               | 1.20-1.45     | 1.77             | 1.65-1.88     |
| Absolute risk <sup>b</sup>                      | 1.08                    | 0.94-1.22     | 1.35               | 1.23-1.48     | 1.73             | 1.62-1.85     |
| Absolute risk difference <sup>b</sup>           | Reference               |               | 0.27               | 0.09-0.46     | 0.65             | 0.46-0.85     |
| RR <sup>b</sup>                                 | Reference               |               | 1.25               | 1.05-1.45     | 1.61             | 1.36-1.86     |
| Absolute risk difference <sup>b</sup>           | -                       |               | Reference          |               | 0.38             | 0.19-0.58     |
| RR <sup>b</sup>                                 | -                       |               | Reference          |               | 1.28             | 1.11-1.45     |
| <b>Depression diagnosis<sup>c</sup> (n=366)</b> |                         |               |                    |               |                  |               |
| <b>Measure</b>                                  | <b>LNG-IUS Exposure</b> |               |                    |               |                  |               |
|                                                 | <b>Low Dose</b>         |               | <b>Medium Dose</b> |               | <b>High Dose</b> |               |
|                                                 | <b>%</b>                | <b>95% CI</b> | <b>%</b>           | <b>95% CI</b> | <b>%</b>         | <b>95% CI</b> |
| Absolute risk <sup>a</sup>                      | 0.20                    | 0.15-0.25     | 0.25               | 0.21-0.30     | 0.32             | 0.26-0.37     |
| Absolute risk <sup>b</sup>                      | 0.21                    | 0.16-0.26     | 0.26               | 0.21-0.31     | 0.30             | 0.24-0.35     |
| Absolute risk difference <sup>b</sup>           | Reference               |               | 0.05               | -0.02-0.12    | 0.09             | 0.01-0.16     |
| RR <sup>b</sup>                                 | Reference               |               | 1.24               | 0.86-1.62     | 1.41             | 0.95-1.86     |
| Absolute risk difference <sup>b</sup>           | -                       |               | Reference          |               | 0.03             | -0.05-0.12    |
| RR <sup>b</sup>                                 | -                       |               | Reference          |               | 1.13             | 0.80-1.47     |

LNG-IUS, levonorgestrel-releasing intrauterine system; RR, risk ratio.

<sup>a</sup>Standardized over calendar period and age.

<sup>b</sup>Standardized over calendar period, age, education level, parental history of mental disorder, endometriosis, polycystic ovarian syndrome, dysmenorrhea, leiomyoma, menorrhagia, and postpartum incident LNG-IUS use. Data on education level were missing for 0.1%, 0.0%, 0.1% of low-, medium-, and high-dose LNG-IUS users, respectively. These were imputed to a separate group in the analyses.

<sup>c</sup>Since no events were registered in the oldest age group and in women diagnosed with leiomyoma resulting in lack of convergence in the Cox regression, these categories were pooled with the second oldest age group and with menorrhagia, respectively.

**TABLE S3. Average absolute risks, risk differences, and risk ratios of starting antidepressant not specifically prescribed for other indications**

| <b>Depression as prescription indication (n=1198)</b>         |                         |               |                    |               |                  |               |
|---------------------------------------------------------------|-------------------------|---------------|--------------------|---------------|------------------|---------------|
| <b>Measure</b>                                                | <b>LNG-IUS Exposure</b> |               |                    |               |                  |               |
|                                                               | <b>Low Dose</b>         |               | <b>Medium Dose</b> |               | <b>High Dose</b> |               |
|                                                               | <b>%</b>                | <b>95% CI</b> | <b>%</b>           | <b>95% CI</b> | <b>%</b>         | <b>95% CI</b> |
| Absolute risk <sup>a</sup>                                    | 0.57                    | 0.47-0.67     | 0.68               | 0.59-0.76     | 1.06             | 0.96-1.15     |
| Absolute risk <sup>b</sup>                                    | 0.59                    | 0.49-0.69     | 0.70               | 0.61-0.79     | 1.02             | 0.94-1.11     |
| Absolute risk difference <sup>b</sup>                         | Reference               |               | 0.11               | -0.03-0.24    | 0.43             | 0.29-0.58     |
| RR <sup>b</sup>                                               | Reference               |               | 1.18               | 0.93-1.43     | 1.73             | 1.38-2.08     |
| Absolute risk difference <sup>b</sup>                         | -                       |               | Reference          |               | 0.33             | 0.18-0.47     |
| RR <sup>b</sup>                                               | -                       |               | Reference          |               | 1.47             | 1.21-1.73     |
| <b>Depression or missing prescription indication (n=1574)</b> |                         |               |                    |               |                  |               |
| <b>Measure</b>                                                | <b>LNG-IUS Exposure</b> |               |                    |               |                  |               |
|                                                               | <b>Low Dose</b>         |               | <b>Medium Dose</b> |               | <b>High Dose</b> |               |
|                                                               | <b>%</b>                | <b>95% CI</b> | <b>%</b>           | <b>95% CI</b> | <b>%</b>         | <b>95% CI</b> |
| Absolute risk <sup>a</sup>                                    | 0.74                    | 0.62-0.85     | 0.93               | 0.82-1.04     | 1.33             | 1.23-1.43     |
| Absolute risk <sup>b</sup>                                    | 0.75                    | 0.63-0.87     | 0.95               | 0.83-1.06     | 1.31             | 1.21-1.41     |
| Absolute risk difference <sup>b</sup>                         | Reference               |               | 0.19               | 0.03-0.36     | 0.56             | 0.40-0.71     |
| RR <sup>b</sup>                                               | Reference               |               | 1.26               | 1.02-1.50     | 1.74             | 1.43-2.05     |
| Absolute risk difference <sup>b</sup>                         | -                       |               | Reference          |               | 0.36             | 0.19-0.53     |
| RR <sup>b</sup>                                               | -                       |               | Reference          |               | 1.38             | 1.16-1.60     |

LNG-IUS, levonorgestrel-releasing intrauterine system; AR, absolute risk; RR, risk ratio.

<sup>a</sup>Standardized over age and calendar year.

<sup>b</sup>Standardized over age, calendar year, education level, parental history of mental disorder, endometriosis, polycystic ovarian syndrome, dysmenorrhea, leiomyoma, menorrhagia, and postpartum incident LNG-IUS use. Data on education level were missing for 0.1%, 0.0%, 0.1% of low-, medium-, and high-dose LNG-IUS users, respectively. These were imputed to a separate group in the analyses.

**TABLE S4. Demographics and clinical profiles restricted to incident users between 2017-2022**

| Measure                                             | LNG-IUS Exposure   |                       |                    |
|-----------------------------------------------------|--------------------|-----------------------|--------------------|
|                                                     | Low Dose , no. (%) | Medium Dose , no. (%) | High Dose, no. (%) |
| Total                                               | 12,940 (13.3)      | 47,712 (48.9)         | 36,850 (37.8)      |
| Age (years)                                         |                    |                       |                    |
| 15-19                                               | 3,768 (29.1)       | 10,498 (22.0)         | 1,467 (4.0)        |
| 20-24                                               | 5,560 (43.0)       | 17,175 (36.0)         | 4,119 (11.2)       |
| 25-29                                               | 2,541 (19.6)       | 9,282 (19.5)          | 8,633 (23.4)       |
| 30-34                                               | 837 (6.5)          | 6,429 (13.5)          | 11,348 (30.8)      |
| 35-39                                               | 207 (1.6)          | 3,348 (7.0)           | 8,665 (23.5)       |
| 40-44                                               | 27 (0.2)           | 980 (2.1)             | 2,618 (7.1)        |
| Calendar year                                       |                    |                       |                    |
| 2017                                                | 3,186 (24.6)       | 1,855 (3.9)           | 7,749 (21.0)       |
| 2018                                                | 2,272 (17.6)       | 5,312 (11.1)          | 6,557 (17.8)       |
| 2019                                                | 1,758 (13.6)       | 7,436 (15.6)          | 5,888 (16.0)       |
| 2020                                                | 2,102 (16.2)       | 10,200 (21.4)         | 5,596 (15.2)       |
| 2021                                                | 2,053 (15.9)       | 12,221 (25.6)         | 5,950 (16.1)       |
| 2022                                                | 1,569 (12.1)       | 10,688 (22.4)         | 5,110 (13.9)       |
| Education level <sup>a</sup>                        |                    |                       |                    |
| Below high school                                   | 3,620 (28.0)       | 10,484 (22.0)         | 3,209 (8.7)        |
| High school/vocational education                    | 6,016 (46.5)       | 21,506 (45.1)         | 13,818 (37.5)      |
| Bachelor's degree or above                          | 3,300 (25.5)       | 15,706 (32.9)         | 19,809 (53.8)      |
| Postpartum initiation                               | 858 (6.6)          | 7,135 (15.0)          | 12,353 (33.5)      |
| Nulliparous                                         | 11,558 (89.3)      | 33,311 (69.8)         | 6,286 (17.1)       |
| Parental history of mental disorder                 | 1,846 (14.3)       | 6,930 (14.5)          | 5,115 (13.9)       |
| Endometriosis                                       | 37 (0.3)           | 186 (0.4)             | 725 (2.0)          |
| Polycystic ovarian syndrome                         | 53 (0.4)           | 372 (0.8)             | 787 (2.1)          |
| Dysmenorrhea                                        | 98 (0.8)           | 314 (0.7)             | 444 (1.2)          |
| Leiomyoma                                           | 7 (0.1)            | 54 (0.1)              | 146 (0.4)          |
| Menorrhagia                                         | 162 (1.3)          | 694 (1.5)             | 1,315 (3.6)        |
| Menorrhagia as prescription indication <sup>b</sup> | 555 (4.3)          | 2,926 (6.1)           | 4,774 (13.0)       |
| Previous hormonal contraceptive use                 |                    |                       |                    |
| None                                                | 1,646 (12.7)       | 4,742 (9.9)           | 1,010 (2.7)        |
| One type                                            | 9,111 (70.4)       | 32,871 (68.9)         | 23,711 (64.3)      |
| Two types                                           | 2,010 (15.5)       | 9,232 (19.3)          | 10,748 (29.2)      |
| Three or more types                                 | 173 (1.3)          | 867 (1.8)             | 1,381 (3.7)        |

LNG-IUS, levonorgestrel-releasing intrauterine system.

<sup>a</sup> Data on education level were missing for 0.0%, 0.0%, 0.0% of low-, medium-, and high-dose LNG-IUS users, respectively.

<sup>b</sup> Data on prescription indication were missing for 5.3%, 4.7%, and 5.1% of low-, medium-, and high-dose LNG-IUS users, respectively.

**TABLE S5. Average absolute risks, risk differences, and relative risks of developing depression between different LNG-IUSs restricted to incident users between 2017-2022**

| Measure                                     | LNG-IUS Exposure |           |             |            |           |           |
|---------------------------------------------|------------------|-----------|-------------|------------|-----------|-----------|
|                                             | Low Dose         |           | Medium Dose |            | High Dose |           |
|                                             | %                | 95% CI    | %           | 95% CI     | %         | 95% CI    |
| <b>Absolute risk<sup>a</sup></b>            | 1.20             | 1.01-1.40 | 1.40        | 1.29-1.52  | 1.71      | 1.53-1.88 |
| <b>Absolute risk<sup>b</sup></b>            | 1.21             | 1.02-1.41 | 1.42        | 1.30-1.53  | 1.66      | 1.49-1.83 |
| <b>Absolute risk difference<sup>b</sup></b> | Reference        |           | 0.20        | -0.03-0.43 | 0.45      | 0.18-0.71 |
| <b>RR<sup>b</sup></b>                       | Reference        |           | 1.17        | 0.96-1.38  | 1.37      | 1.10-1.64 |
| <b>Absolute risk difference<sup>b</sup></b> | -                |           | Reference   |            | 0.24      | 0.02-0.46 |
| <b>RR<sup>b</sup></b>                       | -                |           | Reference   |            | 1.17      | 1.01-1.34 |

LNG-IUS, levonorgestrel-releasing intrauterine system; AR, absolute risk; RR, risk ratio.

<sup>a</sup>Standardized over age and calendar year.

<sup>b</sup>Standardized over age, calendar year, education level, parental history of mental disorder, endometriosis, polycystic ovarian syndrome, dysmenorrhea, leiomyoma, menorrhagia, and postpartum incident LNG-IUS use. Data on education level were missing for 0.0%, 0.0%, 0.0% of low-, medium-, and high-dose LNG-IUS users, respectively. These were imputed to a separate group in the analyses.

**TABLE S6. Demographics and clinical profiles restricted to nulliparous incident LNG-IUS users younger than 30 years of age**

| Measure                                             | LNG-IUS Exposure  |                      |                    |
|-----------------------------------------------------|-------------------|----------------------|--------------------|
|                                                     | Low Dose, no. (%) | Medium Dose, no. (%) | High Dose, no. (%) |
| Total                                               | 19,042 (30.0)     | 31,949 (50.3)        | 12,576 (19.8)      |
| Age (years)                                         |                   |                      |                    |
| 15-19                                               | 6,352 (33.4)      | 10,461 (32.7)        | 3,474 (27.6)       |
| 20-24                                               | 9,457 (49.7)      | 16,453 (51.5)        | 6,414 (51.0)       |
| 25-29                                               | 3,233 (17.0)      | 5,035 (15.8)         | 2,688 (21.4)       |
| Calendar period                                     |                   |                      |                    |
| 2000-2004                                           | 0 (0.0)           | 0 (0.0)              | 147 (1.2)          |
| 2005-2009                                           | 0 (0.0)           | 0 (0.0)              | 921 (7.3)          |
| 2010-2014                                           | 1,666 (8.7)       | 0 (0.0)              | 4,145 (33.0)       |
| 2015-2019                                           | 12,388 (65.1)     | 9,020 (28.2)         | 4,661 (37.1)       |
| 2020-2022                                           | 4,988 (26.2)      | 22,929 (71.8)        | 2,702 (21.5)       |
| Education level <sup>a</sup>                        |                   |                      |                    |
| Below high school                                   | 6,196 (32.5)      | 9,766 (30.6)         | 3,962 (31.5)       |
| High school/vocational education                    | 9,507 (49.9)      | 17,103 (53.5)        | 6,400 (50.9)       |
| Bachelor's degree or above                          | 3,329 (17.5)      | 5,070 (15.9)         | 2,201 (17.5)       |
| Parental history of mental disorder                 | 2,622 (13.8)      | 4,618 (14.5)         | 1,695 (13.5)       |
| Endometriosis                                       | 46 (0.2)          | 50 (0.2)             | 122 (1.0)          |
| Polycystic ovarian syndrome                         | 67 (0.4)          | 86 (0.3)             | 57 (0.5)           |
| Dysmenorrhea                                        | 144 (0.8)         | 196 (0.6)            | 165 (1.3)          |
| Leiomyoma                                           | 5 (0.0)           | 6 (0.0)              | 11 (0.1)           |
| Menorrhagia                                         | 270 (1.4)         | 355 (1.1)            | 342 (2.7)          |
| Menorrhagia as prescription indication <sup>b</sup> | 668 (3.5)         | 2,273 (7.1)          | 1,545 (12.3)       |
| Previous hormonal contraceptive use                 |                   |                      |                    |
| None                                                | 2,525 (13.3)      | 4,432 (13.9)         | 1,176 (9.4)        |
| One type                                            | 13,286 (69.8)     | 23,155 (72.5)        | 8,819 (70.1)       |
| Two types                                           | 2,949 (15.5)      | 4,096 (12.8)         | 2,272 (18.1)       |
| Three or more types                                 | 282 (1.5)         | 266 (0.8)            | 309 (2.5)          |

LNG-IUS, levonorgestrel-releasing intrauterine system.

<sup>a</sup> Data on education level were missing for 0.1%, 0.0%, 0.1% of low-, medium-, and high-dose LNG-IUS users, respectively.

<sup>b</sup> Data on prescription indication were missing for 11.4%, 4.6%, and 18.3% for low-, medium-, and high-dose LNG-IUS users, respectively.



**TABLE S7. Average absolute risks, risk differences, and relative risks of developing depression between different LNG-IUSs restricted to nulliparous incident LNG-IUS users younger than 30 years of age**

| Measure                                     | LNG-IUS Exposure |           |             |            |           |           |
|---------------------------------------------|------------------|-----------|-------------|------------|-----------|-----------|
|                                             | Low Dose         |           | Medium Dose |            | High Dose |           |
|                                             | %                | 95% CI    | %           | 95% CI     | %         | 95% CI    |
| <b>Absolute risk<sup>a</sup></b>            | 1.45             | 1.26-1.64 | 1.71        | 1.54-1.88  | 2.14      | 1.85-2.44 |
| <b>Absolute risk<sup>b</sup></b>            | 1.47             | 1.27-1.66 | 1.72        | 1.55-1.89  | 2.08      | 1.79-2.37 |
| <b>Absolute risk difference<sup>b</sup></b> | Reference        |           | 0.26        | -0.01-0.52 | 0.62      | 0.28-0.95 |
| <b>RR<sup>b</sup></b>                       | Reference        |           | 1.17        | 0.97-1.38  | 1.42      | 1.16-1.68 |
| <b>Absolute risk difference<sup>b</sup></b> | -                |           | Reference   |            | 0.36      | 0.00-0.73 |
| <b>RR<sup>b</sup></b>                       | -                |           | Reference   |            | 1.21      | 0.98-1.44 |

LNG-IUS, levonorgestrel-releasing intrauterine system; AR, absolute risk; RR, risk ratio.

<sup>a</sup>Standardized over calendar period and age.

<sup>b</sup>Standardized over calendar period, age, education level, parental history of mental disorder, endometriosis, polycystic ovarian syndrome, dysmenorrhea, leiomyoma, menorrhagia, and postpartum incident LNG-IUS use. Data on education level were missing for 0.1%, 0.0%, 0.1% of low-, medium-, and high-dose LNG-IUS users, respectively. These were imputed to a separate group in the analyses.

**TABLE S8. Average absolute risks, risk differences, and relative risks of developing depression between different LNG-IUSs when adjusted for menorrhagia as prescription indication and previous hormonal contraceptive use**

| Measure                         | LNG-IUS Exposure |           |             |           |           |           |
|---------------------------------|------------------|-----------|-------------|-----------|-----------|-----------|
|                                 | Low Dose         |           | Medium Dose |           | High Dose |           |
|                                 | %                | 95% CI    | %           | 95% CI    | %         | 95% CI    |
| <b>Absolute risk</b>            | 1.22             | 1.07-1.37 | 1.47        | 1.34-1.61 | 1.83      | 1.71-1.94 |
| <b>Absolute risk difference</b> | Reference        |           | 0.25        | 0.06-0.45 | 0.60      | 0.40-0.81 |
| <b>RR</b>                       | Reference        |           | 1.21        | 1.03-1.39 | 1.50      | 1.28-1.71 |
| <b>Absolute risk difference</b> | -                |           | Reference   |           | 0.35      | 0.15-0.56 |
| <b>RR</b>                       | -                |           | Reference   |           | 1.24      | 1.08-1.40 |

LNG-IUS, levonorgestrel-releasing intrauterine system; AR, absolute risk; RR, risk ratio.

Estimates are standardized over calendar period, age, education level, parental history of mental disorder, endometriosis, polycystic ovarian syndrome, dysmenorrhea, leiomyoma, menorrhagia, postpartum incident LNG-IUS use, number of hormonal contraceptive types used previously, and menorrhagia as prescription indication of LNG-IUS.

Prescription information was missing for 11.5%, 4.7%, and 12.0% and education level for 0.1%, 0.0% and 0.1% of low-, medium-, and high-dose LNG-IUS users, respectively. This was handled by performing multiple imputations with the MICE package in R where prescription indication was imputed using logistic regression and educational level using polytomous logistic regression based on the listed covariates and outcome with 10 iterations and 5 imputations

**TABLE S9. Standard means and standard mean differences of covariates between the groups before and after propensity score weighting**

| Covariates                          | Mean IUS-low | Mean IUS-med | Mean IUS-high | Pop.sd | Std.eff.sz high vs. low | Std.eff.sz high vs. med | Std.eff.sz med vs. low |
|-------------------------------------|--------------|--------------|---------------|--------|-------------------------|-------------------------|------------------------|
| <b>Unweighted</b>                   |              |              |               |        |                         |                         |                        |
| Age                                 |              |              |               |        |                         |                         |                        |
| 15-19                               | 0.29         | 0.22         | 0.04          | 0.37   | <b>0.68</b>             | <b>0.49</b>             | <b>0.19</b>            |
| 20-24                               | 0.43         | 0.36         | 0.11          | 0.45   | <b>0.71</b>             | <b>0.56</b>             | <b>0.16</b>            |
| 25-29                               | 0.20         | 0.19         | 0.23          | 0.41   | <b>0.09</b>             | <b>0.10</b>             | <b>0.00</b>            |
| 30-34                               | 0.06         | 0.13         | 0.31          | 0.39   | <b>0.62</b>             | <b>0.44</b>             | <b>0.18</b>            |
| 35-39                               | 0.02         | 0.07         | 0.24          | 0.33   | <b>0.66</b>             | <b>0.50</b>             | <b>0.16</b>            |
| 40-44                               | 0.00         | 0.02         | 0.07          | 0.19   | <b>0.36</b>             | <b>0.27</b>             | <b>0.10</b>            |
| Calendar year                       |              |              |               |        |                         |                         |                        |
| 2017                                | 0.25         | 0.04         | 0.21          | 0.34   | <b>0.11</b>             | <b>0.51</b>             | <b>0.61</b>            |
| 2018                                | 0.18         | 0.11         | 0.18          | 0.35   | <b>0.01</b>             | <b>0.19</b>             | <b>0.18</b>            |
| 2019                                | 0.14         | 0.16         | 0.16          | 0.36   | <b>0.07</b>             | <b>0.01</b>             | <b>0.06</b>            |
| 2020                                | 0.16         | 0.21         | 0.15          | 0.39   | <b>0.03</b>             | <b>0.16</b>             | <b>0.13</b>            |
| 2021                                | 0.16         | 0.26         | 0.16          | 0.41   | <b>0.01</b>             | <b>0.23</b>             | <b>0.24</b>            |
| 2022                                | 0.12         | 0.22         | 0.14          | 0.38   | <b>0.05</b>             | <b>0.22</b>             | <b>0.27</b>            |
| Educational level <sup>a</sup>      |              |              |               |        |                         |                         |                        |
| Below high school                   | 0.28         | 0.22         | 0.09          | 0.38   | <b>0.50</b>             | <b>0.35</b>             | <b>0.16</b>            |
| High school/vocational education    | 0.46         | 0.45         | 0.37          | 0.49   | <b>0.18</b>             | <b>0.15</b>             | <b>0.03</b>            |
| Bachelor degree or above            | 0.26         | 0.33         | 0.54          | 0.49   | <b>0.58</b>             | <b>0.43</b>             | <b>0.15</b>            |
| Unknown                             | 0.00         | 0.00         | 0.00          | 0.02   | <b>0.00</b>             | <b>0.00</b>             | <b>0.00</b>            |
| Postpartum initiation               | 0.07         | 0.15         | 0.34          | 0.41   | <b>0.66</b>             | <b>0.46</b>             | <b>0.20</b>            |
| Parental history of mental disorder | 0.14         | 0.15         | 0.14          | 0.35   | <b>0.01</b>             | <b>0.02</b>             | <b>0.01</b>            |
| Endometriosis                       | 0.00         | 0.00         | 0.02          | 0.10   | <b>0.17</b>             | <b>0.16</b>             | <b>0.01</b>            |
| Polycystic ovarian syndrome         | 0.00         | 0.01         | 0.02          | 0.11   | <b>0.16</b>             | <b>0.12</b>             | <b>0.03</b>            |
| Dysmenorrhea                        | 0.01         | 0.01         | 0.01          | 0.09   | <b>0.05</b>             | <b>0.06</b>             | <b>0.01</b>            |
| Leiomyoma                           | 0.00         | 0.00         | 0.00          | 0.05   | <b>0.07</b>             | <b>0.06</b>             | <b>0.01</b>            |
| Menorrhagia                         | 0.01         | 0.01         | 0.04          | 0.15   | <b>0.16</b>             | <b>0.14</b>             | <b>0.01</b>            |
| <b>Weighted</b>                     |              |              |               |        |                         |                         |                        |
| Age                                 |              |              |               |        |                         |                         |                        |
| 15-19                               | 0.16         | 0.16         | 0.16          | 0.37   | <b>0.01</b>             | <b>0.00</b>             | <b>0.01</b>            |
| 20-24                               | 0.28         | 0.28         | 0.28          | 0.45   | <b>0.01</b>             | <b>0.00</b>             | <b>0.01</b>            |
| 25-29                               | 0.21         | 0.21         | 0.21          | 0.41   | <b>0.01</b>             | <b>0.00</b>             | <b>0.00</b>            |
| 30-34                               | 0.19         | 0.19         | 0.19          | 0.39   | <b>0.00</b>             | <b>0.00</b>             | <b>0.00</b>            |
| 35-39                               | 0.12         | 0.12         | 0.13          | 0.33   | <b>0.01</b>             | <b>0.00</b>             | <b>0.00</b>            |
| 40-44                               | 0.03         | 0.04         | 0.04          | 0.19   | <b>0.03</b>             | <b>0.00</b>             | <b>0.03</b>            |
| Calendar year                       |              |              |               |        |                         |                         |                        |
| 2017                                | 0.14         | 0.13         | 0.13          | 0.34   | <b>0.01</b>             | <b>0.01</b>             | <b>0.02</b>            |
| 2018                                | 0.15         | 0.14         | 0.14          | 0.35   | <b>0.01</b>             | <b>0.00</b>             | <b>0.01</b>            |
| 2019                                | 0.16         | 0.16         | 0.16          | 0.36   | <b>0.00</b>             | <b>0.00</b>             | <b>0.00</b>            |
| 2020                                | 0.18         | 0.18         | 0.18          | 0.39   | <b>0.01</b>             | <b>0.00</b>             | <b>0.01</b>            |
| 2021                                | 0.20         | 0.21         | 0.21          | 0.41   | <b>0.01</b>             | <b>0.00</b>             | <b>0.02</b>            |
| 2022                                | 0.18         | 0.18         | 0.18          | 0.38   | <b>0.00</b>             | <b>0.00</b>             | <b>0.00</b>            |
| Educational level <sup>a</sup>      |              |              |               |        |                         |                         |                        |
| Below high school                   | 0.18         | 0.18         | 0.18          | 0.38   | <b>0.01</b>             | <b>0.00</b>             | <b>0.01</b>            |
| High school/vocational education    | 0.42         | 0.42         | 0.42          | 0.49   | <b>0.01</b>             | <b>0.00</b>             | <b>0.01</b>            |
| Bachelor degree or above            | 0.40         | 0.40         | 0.40          | 0.49   | <b>0.00</b>             | <b>0.00</b>             | <b>0.00</b>            |
| Unknown                             | 0.00         | 0.00         | 0.00          | 0.02   | <b>0.01</b>             | <b>0.00</b>             | <b>0.00</b>            |
| Postpartum initiation               | 0.21         | 0.21         | 0.21          | 0.41   | <b>0.00</b>             | <b>0.00</b>             | <b>0.00</b>            |
| Parental history of mental disorder | 0.15         | 0.14         | 0.14          | 0.35   | <b>0.01</b>             | <b>0.00</b>             | <b>0.01</b>            |
| Endometriosis                       | 0.01         | 0.01         | 0.01          | 0.10   | <b>0.04</b>             | <b>0.00</b>             | <b>0.03</b>            |
| Polycystic ovarian syndrome         | 0.01         | 0.01         | 0.01          | 0.11   | <b>0.02</b>             | <b>0.00</b>             | <b>0.02</b>            |
| Dysmenorrhea                        | 0.01         | 0.01         | 0.01          | 0.09   | <b>0.02</b>             | <b>0.00</b>             | <b>0.02</b>            |
| Leiomyoma                           | 0.00         | 0.00         | 0.00          | 0.05   | <b>0.01</b>             | <b>0.01</b>             | <b>0.01</b>            |
| Menorrhagia                         | 0.02         | 0.02         | 0.02          | 0.15   | <b>0.02</b>             | <b>0.01</b>             | <b>0.02</b>            |

Standard mean and mean differences obtained before and after weighting on multinomial propensity scores obtained with gradient boosted logistic regression. The maximum number of iterations was set to 15000, and the measure of balance was summarized as the absolute standardized mean difference by setting the stop.method to "es.mean". After weighting, the effective sample sizes were; 4,779,442 for low-, 32,680.0 for medium-, and 19,066.4 for high-dose LNG-IUS users. The effective sample size is the number of observations which would give the same estimates when the sampling variation is similar to the variation obtained after the weighting. IUS-low, low-dose levonorgestrel-releasing intrauterine system; IUS-med, medium-dose levonorgestrel-releasing intrauterine system; IUS-high, high-dose levonorgestrel-releasing intrauterine system; Pop.sd, pooled sample standard deviation, Std.eff.sz, standardized effect size.

**FIGURE S3.** Multinomial propensity score distributions obtained with gradient boosted logistic regression

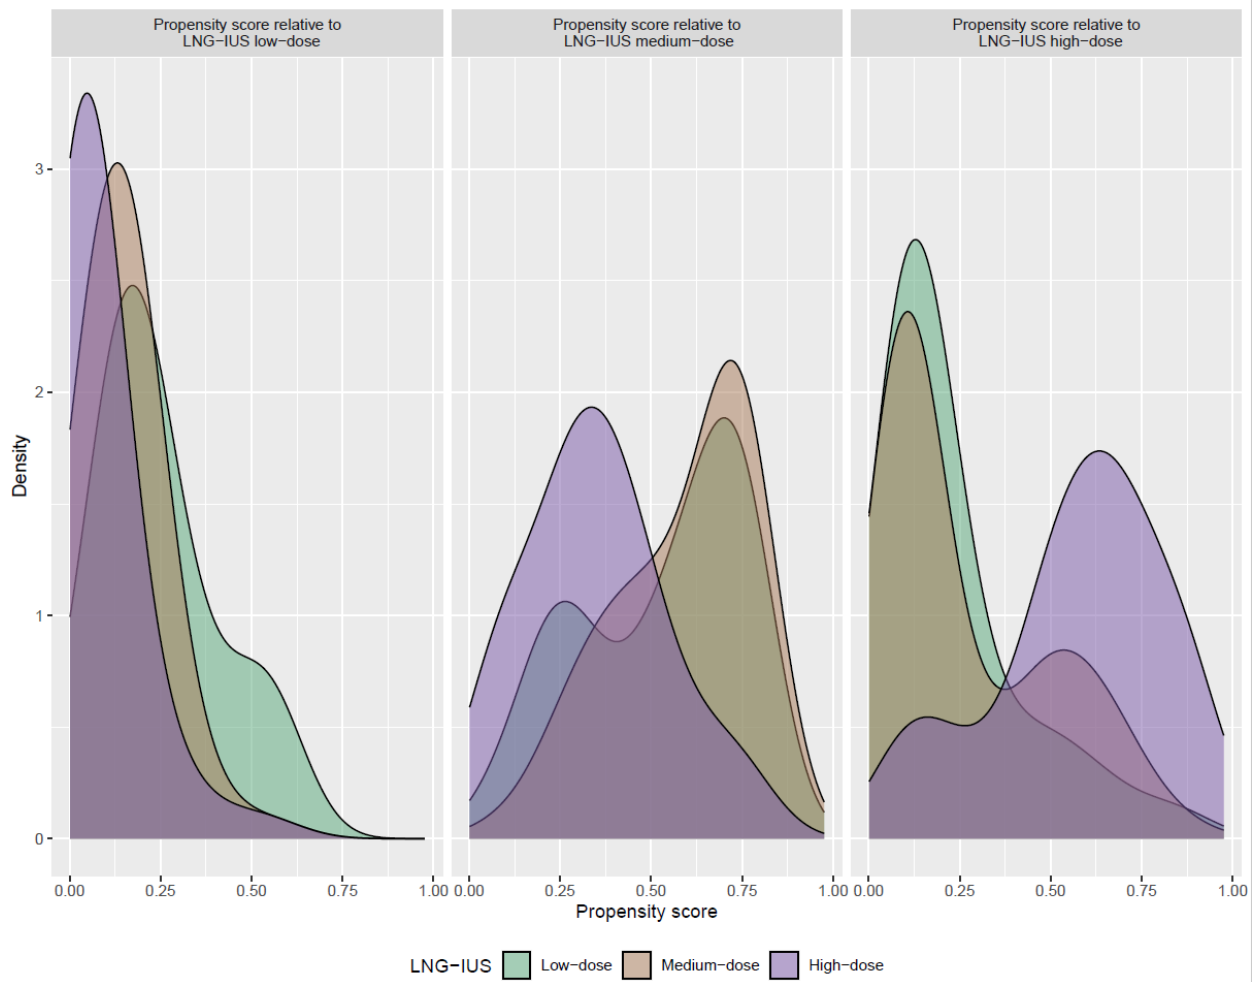

**TABLE S10. Average absolute risks, risk differences, and relative risks of developing depression between different LNG-IUSs in women with history of mental disorder**

| Measure                                     | LNG-IUS Exposure |           |             |            |           |           |
|---------------------------------------------|------------------|-----------|-------------|------------|-----------|-----------|
|                                             | Low Dose         |           | Medium Dose |            | High Dose |           |
|                                             | %                | 95% CI    | %           | 95% CI     | %         | 95% CI    |
| <b>Absolute risk<sup>a</sup></b>            | 4.77             | 4.20-5.34 | 5.12        | 4.69-5.55  | 5.96      | 5.65-6.27 |
| <b>Absolute risk<sup>b</sup></b>            | 4.80             | 4.22-5.37 | 5.22        | 4.78-5.66  | 5.91      | 5.60-6.22 |
| <b>Absolute risk difference<sup>b</sup></b> | Reference        |           | 0.42        | -0.28-1.12 | 1.11      | 0.44-1.78 |
| <b>RR<sup>b</sup></b>                       | Reference        |           | 1.09        | 0.93-1.24  | 1.23      | 1.07-1.40 |
| <b>Absolute risk difference<sup>b</sup></b> | -                |           | Reference   |            | 0.69      | 0.10-1.27 |
| <b>RR<sup>b</sup></b>                       | -                |           | Reference   |            | 1.13      | 1.01-1.25 |

LNG-IUS, levonorgestrel-releasing intrauterine system; AR, absolute risk; RR, risk ratio.

<sup>a</sup>Standardized over calendar period and age.

<sup>b</sup>Standardized over calendar period, age, education level, parental history of mental disorder, endometriosis, polycystic ovarian syndrome, dysmenorrhea, leiomyoma, menorrhagia, and postpartum incident LNG-IUS use. Data on education level were missing for 0.2%, 0.1%, 0.2% of low-, medium-, and high-dose LNG-IUS users, respectively. These were imputed to a separate group in the analyses.
